# Supplementary material for: A theoretical study of the fluoride exchange between UO2F+(aq) and UO22+(aq)
Source: Royal Society of Chemistry journal article supplement (doi:10.1039/b605819a), 2006-01-01
Supplement: b605819a.pdf [file b605819a.pdf]

**Table S1**

Geometry parameters of the precursor complex P1 optimized at different theory levels without symmetry constraints. All the distances are given in Å. For comparison we have also given some experimental (EXAFS) and calculated bond distances for other uranyl(VI) complexes containing fluoride<sup>17</sup>.

| <i>Distance between atoms</i>                                                                                                                      | <i>SCF optimised geometry</i>                                   | <i>RI-MP2 optimised geometry</i>                                |
|----------------------------------------------------------------------------------------------------------------------------------------------------|-----------------------------------------------------------------|-----------------------------------------------------------------|
| U <sub>A</sub> -U <sub>B</sub>                                                                                                                     | 6.616                                                           | 6.581                                                           |
| U <sub>A</sub> -F                                                                                                                                  | 2.300                                                           | 2.261                                                           |
| U <sub>A</sub> -O <sub>yl</sub>                                                                                                                    | 1.719, 1.719                                                    | 1.784, 1.784                                                    |
| U <sub>A</sub> -O <sub>water</sub>                                                                                                                 | 2.495, 2.506, 2.507, 2.498                                      | 2.495, 2.509, 2.489, 2.477,                                     |
| U <sub>B</sub> -F                                                                                                                                  | 4.316                                                           | 4.327                                                           |
| U <sub>B</sub> -O <sub>yl</sub>                                                                                                                    | 1.715, 1.715                                                    | 1.779, 1.779                                                    |
| U <sub>B</sub> -O <sub>water</sub>                                                                                                                 | 2.476 <sup>a</sup> , 2.495, 2.480, 2.495,<br>2.475 <sup>a</sup> | 2.465 <sup>a</sup> , 2.477, 2.462, 2.478,<br>2.466 <sup>a</sup> |
| F – H                                                                                                                                              | 1.719, 1.719                                                    | 1.676, 1.676                                                    |
| U – F and U – OH <sub>2</sub> distances in UO <sub>2</sub> F(OH <sub>2</sub> ) <sub>4</sub> <sup>+</sup> from Gaillard <i>et al.</i> <sup>18</sup> |                                                                 |                                                                 |
| U- F (EXAFS)                                                                                                                                       | 2.24 ± 0.02                                                     |                                                                 |
| U- OH <sub>2</sub> (EXAFS)                                                                                                                         | 2.42 ± 0.02                                                     |                                                                 |
| U – F bond distances in UO <sub>2</sub> (oxalate) <sub>2</sub> F <sup>3-</sup> , from ref. 17                                                      |                                                                 |                                                                 |
| U – F (EXAFS)                                                                                                                                      | 2.22 ± 0.02                                                     |                                                                 |
| U – F                                                                                                                                              | 2.21 (SCF, gas phase)                                           | 2.22(SCF, CPCM)                                                 |
| UO <sub>2</sub> F <sub>4</sub> (OH <sub>2</sub> ) <sub>2</sub> <sup>2-</sup> , from ref. 17                                                        |                                                                 |                                                                 |
| U – F (EXAFS)                                                                                                                                      | 2.26 ± 0.02                                                     |                                                                 |
| U – OH <sub>2</sub> (EXAFS)                                                                                                                        | 2.48 ± 0.02                                                     |                                                                 |
| U – F                                                                                                                                              | 2.28 ± 0.04 (SCF, gas phase)                                    | 2.28 ± 0.04 (SCF, CPCM)                                         |
| U – OH <sub>2</sub>                                                                                                                                | 2.75 (SCF, gas phase)                                           | 2.62 (SCF, CPCM)                                                |

<sup>a</sup> – distance to the oxygen atom in the water molecule that is a hydrogen bond donor

## Coordinates of all complexes

### Total water molecules 9

#### Precursor geometry

SCF-optimised without symmetry constraints

E(SCF,small basis,gas phase)=-1189.35308176

U -0.008804 0.000525 -3.284680  
 U 0.002134 0.002061 3.330940  
 F 0.005284 0.006374 -0.984829  
 O -2.408287 0.147353 -2.616858  
 O 2.389711 -0.165633 -2.607545  
 O 0.145612 1.712597 -3.304702  
 O -0.171454 -1.710809 -3.309608  
 O -1.435101 0.177332 -5.337423

|   |           |           |           |
|---|-----------|-----------|-----------|
| O | 1.452113  | -0.172735 | -5.314879 |
| O | -1.705083 | -0.151897 | 3.390805  |
| O | 1.709582  | 0.155967  | 3.385419  |
| O | -0.209344 | 2.406251  | 3.965059  |
| O | 0.214164  | -2.403269 | 3.960488  |
| O | -0.127190 | 1.385512  | 1.281989  |
| O | 0.127030  | -1.377831 | 1.279523  |
| O | 0.006465  | 0.000159  | 5.810588  |
| H | -1.396911 | 0.900104  | -5.954675 |
| H | -2.073168 | -0.470529 | -5.615966 |
| H | 2.094055  | 0.477136  | -5.579703 |
| H | 1.409409  | -0.882458 | -5.946789 |
| H | -2.970352 | 0.896476  | -2.779092 |
| H | -2.880532 | -0.542284 | -2.165262 |
| H | 2.836428  | 0.471605  | -2.063147 |
| H | 2.971832  | -0.876294 | -2.850984 |
| H | -1.032083 | 2.832426  | 4.184533  |
| H | -0.522209 | -2.965967 | 4.179281  |
| H | 0.527258  | 2.969409  | 4.181891  |
| H | 1.037286  | -2.830720 | 4.175998  |
| H | -0.205138 | 2.329684  | 1.304092  |
| H | 0.201633  | -2.322314 | 1.299828  |
| H | -0.105455 | 1.044458  | 0.380454  |
| H | 0.106195  | -1.035143 | 0.378583  |
| H | -0.771124 | -0.070825 | 6.355207  |
| H | 0.786039  | 0.070315  | 6.352472  |

DFT-optimized without symmetry constraints  
E(b3lyp,small basis, gas phase)=-1197.31552756

**(Complex P2)**

|   |           |           |           |
|---|-----------|-----------|-----------|
| U | -0.011094 | 0.001593  | -3.263479 |
| U | 0.002018  | 0.001567  | 3.324358  |
| F | 0.008886  | 0.010129  | -0.973433 |
| O | -2.393031 | 0.080428  | -2.600259 |
| O | 2.376581  | -0.082793 | -2.602119 |
| O | 0.131342  | 1.772316  | -3.294383 |
| O | -0.172511 | -1.767636 | -3.294800 |
| O | -1.419508 | 0.238975  | -5.299275 |
| O | 1.441846  | -0.252143 | -5.271536 |
| O | -1.762692 | -0.139965 | 3.429907  |
| O | 1.766867  | 0.143069  | 3.427980  |
| O | -0.184141 | 2.399022  | 3.916273  |
| O | 0.188065  | -2.397859 | 3.908025  |
| O | -0.110402 | 1.365601  | 1.282244  |
| O | 0.113758  | -1.354689 | 1.277403  |
| O | 0.003319  | -0.002566 | 5.779758  |
| H | -1.398582 | 1.015733  | -5.883388 |
| H | -2.040613 | -0.425318 | -5.641691 |
| H | 2.081733  | 0.404548  | -5.593290 |
| H | 1.393462  | -1.006366 | -5.882650 |
| H | -2.975829 | 0.849236  | -2.712608 |
| H | -2.881337 | -0.668059 | -2.220879 |
| H | 2.840292  | 0.619979  | -2.119355 |
| H | 2.979386  | -0.815870 | -2.807551 |
| H | -1.018304 | 2.839425  | 4.155414  |
| H | -0.568954 | -2.960599 | 4.147291  |
| H | 0.573211  | 2.961608  | 4.154848  |
| H | 1.022663  | -2.840031 | 4.142343  |
| H | -0.183719 | 2.330686  | 1.315834  |
| H | 0.182893  | -2.320193 | 1.307571  |
| H | -0.090891 | 1.024819  | 0.351938  |
| H | 0.098039  | -1.010533 | 0.348259  |

|   |           |           |          |
|---|-----------|-----------|----------|
| H | -0.791880 | -0.065890 | 6.336450 |
| H | 0.799121  | 0.058814  | 6.335808 |

RI-MP2 optimized without symmetry constraints.

E(RI-MP2, large basis, no ECP on O, gas phase)=-2036.0711410153

|   |            |            |            |
|---|------------|------------|------------|
| U | -0.0142971 | -0.0051617 | -3.2678123 |
| U | 0.0008794  | -0.0030902 | 3.3131172  |
| F | 0.0484544  | 0.1218944  | -1.0113131 |
| O | -2.0206074 | -1.2929515 | -2.5939457 |
| O | 1.9591674  | 1.3378557  | -2.5405618 |
| O | -1.0478624 | 1.4420596  | -3.4054408 |
| O | 0.9038781  | -1.5345594 | -3.2787374 |
| O | -1.0936777 | -0.7829191 | -5.3717849 |
| O | 1.4180293  | 0.8130208  | -5.1583153 |
| O | -1.4107296 | -1.0808848 | 3.4158114  |
| O | 1.4138673  | 1.0713201  | 3.4325945  |
| O | -1.4599256 | 1.9000411  | 3.9313323  |
| O | 1.4596011  | -1.9309407 | 3.8535725  |
| O | -0.8231881 | 1.1083121  | 1.2719461  |
| O | 0.8140536  | -1.0367144 | 1.2278734  |
| O | 0.0169840  | -0.0405081 | 5.7743033  |
| H | -1.7720781 | -0.3167189 | -5.8856385 |
| H | -0.9236137 | -1.6115717 | -5.8471336 |
| H | 1.1766996  | 1.5358990  | -5.7599887 |
| H | 2.0287031  | 0.2494262  | -5.6606649 |
| H | -2.9351852 | -0.9718553 | -2.6233230 |
| H | -2.0796552 | -2.2595598 | -2.5437185 |
| H | 2.1101795  | 1.6924220  | -1.6540602 |
| H | 2.5878755  | 1.7750445  | -3.1330831 |
| H | -2.3725238 | 1.8217082  | 4.2560238  |
| H | 1.1461836  | -2.8027862 | 4.1469453  |
| H | -1.1467523 | 2.7684800  | 4.2350184  |
| H | 2.3812569  | -1.8678868 | 4.1552649  |
| H | -1.4458809 | 1.8480604  | 1.2616942  |
| H | 1.3922296  | -1.8106013 | 1.1842601  |
| H | -0.6114727 | 0.8676869  | 0.3387938  |
| H | 0.6196748  | -0.7420822 | 0.3063544  |
| H | -0.5939262 | -0.5212637 | 6.3570271  |
| H | 0.6366044  | 0.4232799  | 6.3616094  |

### *Associative-Intermediate geometry*

SCF optimized (in PCM) without symmetry constraints.

The convergence threshold on the gradient norm was set to 0.002 a.u.

E(SCF, small basis, PCM)=-1189.88506997

|   |           |           |           |
|---|-----------|-----------|-----------|
| U | -1.858355 | -0.169664 | -0.082962 |
| U | 2.755035  | -0.106670 | 0.089850  |
| F | 0.485226  | -0.446703 | -0.198509 |
| O | -2.096261 | -1.615084 | -1.002728 |
| O | -1.376937 | 1.330985  | 0.660569  |
| O | -1.044323 | 0.715980  | -2.209702 |
| O | -3.591053 | 1.289308  | -1.060983 |
| O | -4.308165 | -1.018680 | 0.181488  |
| O | -2.995904 | 0.079710  | 2.248091  |
| O | -1.083757 | -1.748957 | 1.644918  |
| O | 2.849291  | 0.805896  | -1.376817 |
| O | 2.734929  | -1.008395 | 1.566109  |
| O | 2.408695  | -2.162793 | -1.217000 |
| O | 4.915544  | -1.103236 | -0.415714 |
| O | 4.326747  | 1.450783  | 1.100358  |
| O | 1.503525  | 1.735662  | 1.156686  |
| H | -1.130392 | 0.243065  | -3.038578 |

|   |           |           |           |
|---|-----------|-----------|-----------|
| H | -0.614760 | 1.562189  | -2.340047 |
| H | -4.467498 | 1.001336  | -1.310521 |
| H | -3.442780 | 2.203405  | -1.302192 |
| H | -4.571018 | -1.814006 | -0.278809 |
| H | -5.028385 | -0.659697 | 0.695508  |
| H | -3.624947 | -0.488164 | 2.690083  |
| H | -2.812992 | 0.864575  | 2.761928  |
| H | -0.561678 | -2.532411 | 1.474654  |
| H | -1.238865 | -1.633689 | 2.579767  |
| H | 1.572288  | -2.433086 | -1.595028 |
| H | 3.100032  | -2.788551 | -1.433511 |
| H | 5.431159  | -0.911225 | -1.202474 |
| H | 5.403765  | -1.676267 | 0.179860  |
| H | 4.741824  | 2.181520  | 0.636304  |
| H | 4.680471  | 1.367571  | 1.988799  |
| H | 1.913549  | 2.457279  | 1.633302  |
| H | 0.555208  | 1.826098  | 1.138838  |

DFT optimized without symmetry constraints  
E(B3LYP,small basis,gas)=-1197.29747577

**(COMPLEX B2)**

|   |           |           |           |
|---|-----------|-----------|-----------|
| U | 2.431426  | -0.000399 | 0.007605  |
| U | -2.203935 | -0.064653 | -0.036688 |
| F | 0.130893  | -0.339841 | -0.007822 |
| O | 2.218460  | -2.450927 | -0.063929 |
| O | 1.175673  | 2.122978  | 0.024911  |
| O | 2.510246  | -0.005957 | -1.767048 |
| O | 2.485875  | -0.090740 | 1.781018  |
| O | 4.738982  | -0.871218 | -0.014328 |
| O | 3.938386  | 1.985265  | 0.106093  |
| O | -2.382461 | -1.831040 | -0.176662 |
| O | -1.644331 | 1.652037  | -0.056458 |
| O | -3.801112 | 1.115151  | -1.591102 |
| O | -3.435776 | 1.222284  | 1.812114  |
| O | -1.534272 | -0.455057 | -2.371817 |
| O | -1.591854 | -0.809950 | 2.240052  |
| O | -4.658731 | -0.760951 | 0.301149  |
| H | 5.242313  | -1.088653 | -0.817632 |
| H | 5.275353  | -1.054663 | 0.775961  |
| H | 4.407988  | 2.355422  | -0.661566 |
| H | 4.312425  | 2.342561  | 0.930312  |
| H | 2.177689  | -2.977810 | -0.879436 |
| H | 2.262098  | -3.033216 | 0.712831  |
| H | 1.589778  | 2.998966  | 0.032302  |
| H | 0.199162  | 2.177162  | 0.002275  |
| H | -4.504852 | 0.715301  | -2.128435 |
| H | -4.078552 | 0.879584  | 2.454536  |
| H | -3.755898 | 2.073708  | -1.743520 |
| H | -3.336031 | 2.184642  | 1.901098  |
| H | -1.453445 | -1.356826 | -2.723809 |
| H | -1.452683 | -1.748615 | 2.446152  |
| H | -1.356565 | 0.202114  | -3.064057 |
| H | -1.456230 | -0.256889 | 3.026106  |
| H | -4.864388 | -1.711434 | 0.293373  |
| H | -5.468097 | -0.232997 | 0.397641  |

RI-MP2 optimized without symmetry constraints

E(RI-MP2, large basis, no ECP on O, gas phase)=-2036.0585645754

|   |            |            |            |
|---|------------|------------|------------|
| U | 2.1995964  | -0.0275805 | 0.0619314  |
| U | -2.3859432 | -0.0107235 | -0.0224121 |
| F | -0.0996953 | -0.2856982 | -0.0849886 |
| O | 2.2532505  | -1.7981018 | 0.2800783  |

|   |            |            |            |
|---|------------|------------|------------|
| O | 1.7466397  | 1.7097348  | 0.2027495  |
| O | 1.3860310  | -0.1620370 | 2.3884834  |
| O | 4.1048512  | 0.5980991  | 1.5224214  |
| O | 4.5661666  | -1.0214640 | -0.6913875 |
| O | 3.5577920  | 1.3849760  | -1.7068598 |
| O | 1.6698583  | -0.5089501 | -2.3090130 |
| O | -2.4203925 | -0.0771383 | 1.7582691  |
| O | -2.5092604 | -0.0454296 | -1.7991511 |
| O | -2.0983355 | -2.4631479 | -0.0441820 |
| O | -4.6749252 | -0.9542933 | 0.0124165  |
| O | -3.9451271 | 1.9388203  | 0.0071602  |
| O | -1.2080855 | 2.1822271  | -0.0013819 |
| H | 1.4365990  | -0.9666101 | 2.9286351  |
| H | 1.1845560  | 0.5617747  | 3.0010014  |
| H | 4.8732554  | 0.0264728  | 1.6750664  |
| H | 4.2349160  | 1.3853736  | 2.0737014  |
| H | 4.6410991  | -1.9871873 | -0.7460947 |
| H | 5.4357312  | -0.6902924 | -0.9602412 |
| H | 4.3004370  | 1.1665987  | -2.2888514 |
| H | 3.5699077  | 2.3519117  | -1.6323563 |
| H | 1.3106965  | -1.3191796 | -2.7002222 |
| H | 1.8748970  | 0.0922578  | -3.0408944 |
| H | -2.0796365 | -3.0421415 | 0.7343572  |
| H | -2.2293216 | -3.0498260 | -0.8059823 |
| H | -5.1891298 | -1.2146790 | 0.7940095  |
| H | -5.2358507 | -1.1589070 | -0.7534530 |
| H | -4.4465815 | 2.2324611  | 0.7859124  |
| H | -4.4629257 | 2.2342496  | -0.7602083 |
| H | -1.6329230 | 3.0520541  | -0.0169268 |
| H | -0.2479810 | 2.3228061  | 0.0200451  |

***Associative-Transition State geometry 1***

B3LYP optimized without symmetry constraints

E(B3LYP, small basis, gas) = -1197.29248419

**(COMPLEX TB2)**

|   |           |           |           |
|---|-----------|-----------|-----------|
| U | -2.420168 | 0.010944  | -0.056493 |
| U | 2.289377  | 0.037915  | 0.058954  |
| F | -0.222950 | 0.633445  | -0.171795 |
| O | -2.406031 | 2.257264  | 0.968990  |
| O | -1.177111 | -1.436385 | -1.587112 |
| O | -3.060126 | 0.935235  | -1.428495 |
| O | -1.874760 | -0.889424 | 1.400234  |
| O | -4.567141 | 0.217434  | 1.141889  |
| O | -3.862248 | -1.821117 | -0.911384 |
| O | 3.036906  | 1.090605  | 1.271716  |
| O | 1.562223  | -1.064815 | -1.159016 |
| O | 3.692385  | 0.777977  | -1.842048 |
| O | 2.716187  | -2.286725 | 0.926443  |
| O | 1.619856  | 2.206542  | -0.900987 |
| O | 0.939518  | -0.359975 | 2.089775  |
| O | 4.777115  | -0.582044 | 0.128960  |
| H | -5.353072 | 0.694237  | 0.823526  |
| H | -4.752650 | -0.189168 | 2.005826  |
| H | -4.507529 | -1.685102 | -1.627477 |
| H | -3.994116 | -2.694959 | -0.504590 |
| H | -2.758135 | 3.026033  | 0.488036  |
| H | -2.170521 | 2.508659  | 1.877401  |
| H | -1.569339 | -2.029369 | -2.245997 |
| H | -0.200661 | -1.393808 | -1.661850 |
| H | 4.643258  | 0.585845  | -1.856197 |
| H | 3.042184  | -2.549324 | 1.803296  |
| H | 3.386562  | 1.144084  | -2.687127 |

|   |          |           |           |
|---|----------|-----------|-----------|
| H | 2.462977 | -3.068435 | 0.408358  |
| H | 2.145752 | 3.021950  | -0.934691 |
| H | 1.210185 | -0.016103 | 2.956604  |
| H | 0.673616 | 2.361736  | -1.044205 |
| H | 0.054426 | -0.772141 | 2.123256  |
| H | 5.374759 | -0.055304 | 0.688086  |
| H | 5.177470 | -1.441445 | -0.084204 |

***Intermediate following a dissociation of water from A-intermediate***

SCF-optimised without symmetry constraints.

E(SCF,small basis,gas phase)=-1189.35461249

|   |           |           |           |
|---|-----------|-----------|-----------|
| O | 2.572837  | -1.208611 | -1.05659  |
| U | 2.116353  | 0.074462  | -0.016702 |
| O | 1.125237  | -1.625873 | 1.52424   |
| F | -0.206395 | -0.056737 | -0.376704 |
| U | -2.518995 | -0.071054 | -0.055633 |
| O | -1.419317 | 1.755525  | 1.24701   |
| O | 1.624905  | 1.385670  | 1.00188   |
| O | 1.776112  | 1.466905  | -2.03843  |
| O | 4.286056  | 1.115536  | -0.533132 |
| O | 3.814327  | -0.682404 | 1.59500   |
| O | -2.879629 | 1.018096  | -1.32917  |
| O | -2.194567 | -1.201901 | 1.20819   |
| O | -2.122949 | -1.743650 | -1.83669  |
| O | -4.692500 | -1.217062 | -0.403324 |
| O | -4.177366 | 1.147108  | 1.36231   |
| O | 6.199322  | -0.738130 | 0.230525  |
| H | 2.103745  | 1.201176  | -2.89203  |
| H | 1.325687  | 2.302302  | -2.09704  |
| H | 5.096517  | 0.604079  | -0.433912 |
| H | 4.462793  | 2.019074  | -0.763883 |
| H | 6.410217  | -1.457183 | -0.355655 |
| H | 6.985577  | -0.432107 | 0.671052  |
| H | 4.704573  | -0.890706 | 1.28490   |
| H | 3.780736  | -0.600293 | 2.54064   |
| H | 0.221021  | -1.665311 | 1.81569   |
| H | 1.615671  | -2.382461 | 1.82563   |
| H | -2.128961 | -1.521941 | -2.76218  |
| H | -1.975066 | -2.675735 | -1.71825  |
| H | -5.288415 | -1.045475 | -1.12595  |
| H | -5.046938 | -1.896104 | 0.162188  |
| H | -4.785068 | 1.795825  | 1.01930   |
| H | -4.398234 | 0.929764  | 2.26287   |
| H | -1.893518 | 2.442744  | 1.69880   |
| H | -0.477699 | 1.869865  | 1.33337   |

B3LYP optimized without symmetry constraints

E(B3LYP, small basis, gas)=-1197.31849119

**(COMPLEX B4)**

|   |           |           |           |
|---|-----------|-----------|-----------|
| U | 2.061935  | 0.071282  | 0.069805  |
| U | -2.482830 | 0.012871  | -0.004251 |
| F | -0.238487 | 0.130053  | 0.616278  |
| O | 2.578334  | -0.882651 | 1.470992  |
| O | 1.470560  | 1.072697  | -1.299729 |
| O | 1.871480  | 1.970750  | 1.612878  |
| O | 4.248374  | 1.136544  | 0.111899  |
| O | 6.075536  | -0.796879 | -0.304142 |
| O | 3.622167  | -1.174132 | -1.314809 |
| O | 0.939007  | -1.947191 | -0.794664 |
| O | -3.110110 | 1.429629  | 0.849980  |
| O | -1.946074 | -1.423236 | -0.934849 |

|   |           |           |           |
|---|-----------|-----------|-----------|
| O | -2.084991 | -1.109990 | 2.158327  |
| O | -4.528840 | -1.169954 | 0.689540  |
| O | -4.068130 | 0.589155  | -1.788766 |
| O | -1.306902 | 1.497547  | -1.566651 |
| H | 2.255152  | 1.946647  | 2.506919  |
| H | 1.405337  | 2.811481  | 1.469537  |
| H | 5.072497  | 0.580084  | 0.072478  |
| H | 4.448243  | 2.085184  | 0.080070  |
| H | 6.394140  | -1.334904 | 0.443015  |
| H | 6.814040  | -0.619630 | -0.914860 |
| H | 4.578822  | -1.248820 | -1.042101 |
| H | 3.486216  | -1.447932 | -2.235870 |
| H | -0.003849 | -2.002513 | -1.048368 |
| H | 1.350088  | -2.827139 | -0.781689 |
| H | -1.229422 | -1.081942 | 2.615080  |
| H | -2.753656 | -1.555517 | 2.703281  |
| H | -5.260992 | -0.751420 | 1.176630  |
| H | -4.787121 | -2.063411 | 0.401354  |
| H | -4.763984 | 1.265697  | -1.711743 |
| H | -4.156219 | 0.113908  | -2.633759 |
| H | -1.727624 | 2.196810  | -2.091916 |
| H | -0.336210 | 1.482554  | -1.705565 |

RI-MP2 optimized without symmetry constraints

E(RI-MP2, large basis, no ECP on O, gas phase)=-2036.0754040691

|   |            |            |            |
|---|------------|------------|------------|
| U | 2.1178934  | 0.0980678  | 0.0372626  |
| U | -2.4340048 | -0.0353828 | 0.0217615  |
| F | -0.1706372 | 0.0245523  | 0.4222669  |
| O | 2.4986327  | -1.2880874 | 1.0864410  |
| O | 1.7664452  | 1.5453107  | -0.9595174 |
| O | 1.8689944  | 1.4643508  | 2.0663735  |
| O | 4.3592414  | 0.9104468  | 0.5826804  |
| O | 5.9985588  | -1.1321618 | -0.1803261 |
| O | 3.6951529  | -0.8379362 | -1.6042904 |
| O | 1.0301032  | -1.4176324 | -1.6205192 |
| O | -2.8427735 | 1.1808390  | 1.2534838  |
| O | -2.1221618 | -1.3397260 | -1.1641762 |
| O | -2.1092472 | -1.6066715 | 1.8861911  |
| O | -4.6468075 | -1.0569062 | 0.4137240  |
| O | -3.9965718 | 1.1156525  | -1.5386808 |
| O | -1.2960936 | 1.6499134  | -1.4199450 |
| H | 2.2084803  | 1.1974907  | 2.9365119  |
| H | 1.6305432  | 2.4013285  | 2.1496808  |
| H | 5.1161742  | 0.2834823  | 0.4972414  |
| H | 4.7200957  | 1.8084918  | 0.5264773  |
| H | 6.1530721  | -1.9009383 | 0.3942569  |
| H | 6.8695103  | -0.9721627 | -0.5823988 |
| H | 4.5720541  | -1.1213004 | -1.2430359 |
| H | 3.8744112  | -0.4483414 | -2.4750754 |
| H | 0.0981176  | -1.6709803 | -1.7081112 |
| H | 1.5494314  | -2.0928937 | -2.0841236 |
| H | -2.2072719 | -1.3793849 | 2.8252064  |
| H | -2.0003766 | -2.5706522 | 1.8555534  |
| H | -5.3029801 | -0.7848685 | 1.0767788  |
| H | -5.0227603 | -1.8387015 | -0.0235749 |
| H | -4.6474652 | 1.7800288  | -1.2553635 |
| H | -4.3467740 | 0.7481495  | -2.3675614 |
| H | -1.7576054 | 2.2777980  | -1.9959224 |
| H | -0.3626960 | 1.9161929  | -1.3993009 |

*Associative-Transition State geometry 2*

B3LYP optimized without symmetry constraints

E(B3LYP, small basis, gas)= -1197.29675704

**(COMPLEX TB4)**

|   |           |           |           |
|---|-----------|-----------|-----------|
| U | -2.440033 | -0.017211 | -0.024609 |
| U | 2.187806  | -0.020876 | 0.063557  |
| F | -0.134594 | -0.324547 | -0.065437 |
| O | -2.168953 | -2.458506 | 0.050508  |
| O | -1.214272 | 2.125574  | -0.107815 |
| O | -2.433535 | 0.009389  | 1.752904  |
| O | -2.567132 | -0.129959 | -1.792110 |
| O | -4.724642 | -0.930417 | 0.117027  |
| O | -3.979298 | 1.941158  | -0.119789 |
| O | 2.437507  | -1.767274 | 0.297820  |
| O | 1.610761  | 1.686567  | 0.102400  |
| O | 3.981205  | 0.770924  | 1.524534  |
| O | 3.426663  | 1.291809  | -1.734206 |
| O | 1.373636  | -0.198592 | 2.376952  |
| O | 1.694472  | -0.854290 | -2.218949 |
| O | 4.771951  | -0.873883 | -0.444821 |
| H | -5.187288 | -1.136639 | 0.947391  |
| H | -5.290330 | -1.148581 | -0.643470 |
| H | -4.410862 | 2.345429  | 0.653038  |
| H | -4.403675 | 2.251280  | -0.938836 |
| H | -2.057329 | -2.980779 | 0.862262  |
| H | -2.242232 | -3.045207 | -0.720709 |
| H | -1.644455 | 2.991152  | -0.178817 |
| H | -0.240211 | 2.203096  | -0.062906 |
| H | 4.834570  | 0.308112  | 1.483090  |
| H | 4.035806  | 0.978246  | -2.421701 |
| H | 3.997137  | 1.509917  | 2.153704  |
| H | 3.367944  | 2.261938  | -1.740511 |
| H | 1.554838  | -0.984507 | 2.919337  |
| H | 1.633123  | -1.804863 | -2.409081 |
| H | 0.866513  | 0.456320  | 2.883581  |
| H | 1.502535  | -0.330526 | -3.013748 |
| H | 4.854233  | -1.839391 | -0.354989 |
| H | 5.578972  | -0.510065 | -0.847510 |

***Dissociative-Intermediate geometry***

SCF optimized in  $C_s$  symmetry

E(SCF, small basis, gas)= -1189.33684591

|   |           |           |           |
|---|-----------|-----------|-----------|
| U | 0.779838  | -2.745340 | 0.000000  |
| U | -0.882452 | 2.945664  | 0.000000  |
| F | -0.823560 | 0.633992  | 0.000000  |
| O | -0.199084 | -4.145246 | 0.000000  |
| O | 1.755148  | -1.323922 | 0.000000  |
| O | -0.703019 | -1.563406 | 1.499020  |
| O | -0.703019 | -1.563406 | -1.499020 |
| O | 2.220798  | -3.948636 | 1.520119  |
| O | 2.220798  | -3.948636 | -1.520119 |
| O | 2.349409  | -6.274478 | 0.000000  |
| O | -0.914802 | 2.981932  | 1.718631  |
| O | -0.914802 | 2.981932  | -1.718631 |
| O | -3.288027 | 2.322940  | 0.000000  |
| O | -2.158064 | 5.089733  | 0.000000  |
| O | 0.818058  | 4.792300  | 0.000000  |
| O | 1.449160  | 2.052628  | 0.000000  |
| H | -1.264031 | -1.871543 | 2.201537  |
| H | -1.264031 | -1.871543 | -2.201537 |
| H | -0.861341 | -0.641219 | 1.266011  |
| H | -0.861341 | -0.641219 | -1.266011 |
| H | 2.321873  | -4.887275 | 1.320872  |



|   |           |           |           |
|---|-----------|-----------|-----------|
| H | 2.321873  | -4.887275 | -1.320872 |
| H | 2.791851  | -3.667282 | 2.226447  |
| H | 2.791851  | -3.667282 | -2.226447 |
| H | 1.598029  | -6.858839 | 0.000000  |
| H | 3.155987  | -6.780217 | 0.000000  |
| H | -3.818770 | 2.222258  | 0.782518  |
| H | -3.818770 | 2.222258  | -0.782518 |
| H | -2.440332 | 5.552846  | 0.781821  |
| H | -2.440332 | 5.552846  | -0.781821 |
| H | 1.114660  | 5.245371  | 0.782816  |
| H | 1.114660  | 5.245371  | -0.782816 |
| H | 2.246755  | 2.565238  | 0.000000  |
| H | 1.622999  | 1.119297  | 0.000000  |

B3LYP optimized in  $C_s$  symmetry

E(B3LYP, small basis, gas) = -1197.30938985

**(COMPLEX D2)**

|   |           |           |           |
|---|-----------|-----------|-----------|
| U | 0.721908  | -2.690530 | 0.000000  |
| U | -0.895121 | 2.871914  | 0.000000  |
| F | -0.978388 | 0.566769  | 0.000000  |
| O | -0.215778 | -4.189383 | 0.000000  |
| O | 1.638490  | -1.152595 | 0.000000  |
| O | -0.785803 | -1.583073 | 1.477811  |
| O | -0.785803 | -1.583073 | -1.477811 |
| O | 2.195371  | -3.843868 | 1.479095  |
| O | 2.195371  | -3.843868 | -1.479095 |
| O | 2.512692  | -6.080169 | 0.000000  |
| O | -0.945451 | 2.932944  | 1.775160  |
| O | -0.945451 | 2.932944  | -1.775160 |
| O | -3.308978 | 2.390029  | 0.000000  |
| O | -2.009432 | 5.076257  | 0.000000  |
| O | 0.931689  | 4.577424  | 0.000000  |
| O | 1.358525  | 1.847597  | 0.000000  |
| H | -1.382717 | -1.923066 | 2.164516  |
| H | -1.382717 | -1.923066 | -2.164516 |
| H | -0.973652 | -0.641435 | 1.223145  |
| H | -0.973652 | -0.641435 | -1.223145 |
| H | 2.360582  | -4.793673 | 1.222445  |
| H | 2.360582  | -4.793673 | -1.222445 |
| H | 2.759611  | -3.551188 | 2.213871  |
| H | 2.759611  | -3.551188 | -2.213871 |
| H | 1.800685  | -6.746426 | 0.000000  |
| H | 3.375931  | -6.533726 | 0.000000  |
| H | -3.859505 | 2.323796  | 0.797976  |
| H | -3.859505 | 2.323796  | -0.797976 |
| H | -2.271349 | 5.567111  | 0.797449  |
| H | -2.271349 | 5.567111  | -0.797449 |
| H | 1.241964  | 5.039740  | 0.797712  |
| H | 1.241964  | 5.039740  | -0.797712 |
| H | 2.180218  | 2.361075  | 0.000000  |
| H | 1.529108  | 0.887949  | 0.000000  |

RI-MP2 optimized in  $C_s$  symmetry

E(RI-MP2, large basis, no ECP on O, gas phase) = -2036.0550200219

|   |            |            |            |
|---|------------|------------|------------|
| U | -0.0513875 | -2.8575554 | 0.0000000  |
| U | 0.0239549  | 3.0306406  | 0.0000000  |
| F | -0.5997423 | 0.8391355  | 0.0000000  |
| O | -1.5018064 | -3.8813357 | 0.0000000  |
| O | 1.3803526  | -1.7880865 | 0.0000000  |
| O | -1.0319388 | -1.2508338 | 1.4981149  |
| O | -1.0319388 | -1.2508338 | -1.4981149 |
| O | 0.8488408  | -4.4692714 | 1.5377857  |

|   |            |            |            |
|---|------------|------------|------------|
| O | 0.8488408  | -4.4692714 | -1.5377857 |
| O | 0.2672928  | -6.6544897 | 0.0000000  |
| O | -0.0155007 | 3.1167967  | 1.7801848  |
| O | -0.0155007 | 3.1167967  | -1.7801848 |
| O | -2.4471040 | 3.1699894  | 0.0000000  |
| O | -0.5302548 | 5.4525090  | 0.0000000  |
| O | 2.2100851  | 4.2513689  | 0.0000000  |
| O | 2.0172631  | 1.5240814  | 0.0000000  |
| H | -1.8264954 | -1.2998627 | 2.0530535  |
| H | -1.8264954 | -1.2998627 | -2.0530538 |
| H | -0.9294210 | -0.3211068 | 1.1688515  |
| H | -0.9294210 | -0.3211068 | -1.1688515 |
| H | 0.6337891  | -5.4017540 | 1.2877399  |
| H | 0.6337891  | -5.4017540 | -1.2877399 |
| H | 1.6015034  | -4.4854516 | 2.1511650  |
| H | 1.6015034  | -4.4854516 | -2.1511650 |
| H | -0.6218742 | -7.0486343 | 0.0000000  |
| H | 0.8531316  | -7.4310629 | 0.0000000  |
| H | -3.0046482 | 3.3480076  | 0.7738590  |
| H | -3.0046482 | 3.3480076  | -0.7738590 |
| H | -0.6772599 | 6.0191456  | 0.7743526  |
| H | -0.6772599 | 6.0191456  | -0.7743526 |
| H | 2.5748486  | 4.7127264  | 0.7729662  |
| H | 2.5748486  | 4.7127264  | -0.7729662 |
| H | 2.9410256  | 1.8131147  | 0.0000000  |
| H | 2.0141120  | 0.5563891  | 0.0000000  |

***Dissociative-Transition State geometry***

B3LYP optimized without symmetry constraints

E(B3LYP, small basis, gas)=-1197.30369598

**(COMPLEX TD2)**

|   |           |           |           |
|---|-----------|-----------|-----------|
| U | 2.974616  | 0.032746  | -0.009356 |
| U | -2.873222 | -0.081827 | 0.041372  |
| F | 0.803912  | -0.738375 | -0.078155 |
| O | 3.248219  | -2.395954 | -0.278525 |
| O | 1.308557  | 1.850273  | 0.249257  |
| O | 3.017524  | 0.209744  | -1.777142 |
| O | 3.079657  | -0.203168 | 1.748570  |
| O | 5.414305  | -0.344100 | -0.092611 |
| O | 4.034403  | 2.284592  | 0.220578  |
| O | -3.991144 | -1.444217 | -0.093794 |
| O | -1.674639 | 1.228635  | 0.272697  |
| O | -3.730709 | 1.016733  | -1.888150 |
| O | -3.852494 | 0.475367  | 2.185992  |
| O | -1.333635 | -0.972892 | -1.556645 |
| O | -1.322072 | -1.422729 | 1.269889  |
| O | -5.837122 | 0.792518  | -0.488798 |
| H | 5.948753  | -0.346383 | -0.904899 |
| H | 5.973818  | -0.540054 | 0.678113  |
| H | 4.357096  | 2.809968  | -0.531930 |
| H | 4.404754  | 2.627675  | 1.052184  |
| H | 3.331526  | -2.853946 | -1.131564 |
| H | 3.370294  | -3.021515 | 0.455048  |
| H | 0.343682  | 1.715995  | 0.270117  |
| H | 1.546506  | 2.783903  | 0.352045  |
| H | -4.718552 | 1.069319  | -1.802134 |
| H | -4.638829 | 0.039602  | 2.560134  |
| H | -3.362719 | 1.482856  | -2.654748 |
| H | -3.516344 | 1.147318  | 2.805079  |
| H | -1.491274 | -1.534376 | -2.332687 |
| H | -1.470877 | -2.209152 | 1.818970  |

|   |           |           |           |
|---|-----------|-----------|-----------|
| H | -0.378510 | -0.928654 | -1.288867 |
| H | -0.367582 | -1.281122 | 1.036823  |
| H | -6.432726 | 0.027279  | -0.579804 |
| H | -6.349298 | 1.573681  | -0.214479 |

## Total water molecules 10

### *Precursor geometry*

DFT-optimized without symmetry constraints

E(B3LYP,small basis, gas phase)= -1214.59497966

#### (COMPLEX P1)

|   |           |           |           |
|---|-----------|-----------|-----------|
| U | -3.024923 | -0.114732 | 0.015544  |
| U | 3.532389  | 0.049598  | -0.007111 |
| F | -0.715964 | -0.125105 | 0.002904  |
| O | -2.456767 | -0.631732 | -2.345223 |
| O | -2.422241 | 0.146017  | 2.407224  |
| O | -3.003641 | -1.870579 | 0.295386  |
| O | -2.961400 | 1.640749  | -0.261898 |
| O | -5.068354 | -0.202379 | -1.354857 |
| O | -5.051246 | 0.203008  | 1.374895  |
| O | 3.655984  | -0.197463 | -1.759540 |
| O | 3.622704  | 0.303047  | 1.746440  |
| O | 4.230643  | -2.305092 | 0.327224  |
| O | 4.032049  | 2.450138  | -0.362109 |
| O | 1.553512  | -1.386964 | 0.175385  |
| O | 1.444284  | 1.315959  | -0.195670 |
| O | 5.987967  | 0.158087  | 0.011887  |
| H | -5.911773 | 0.252166  | -1.094943 |
| H | -5.180488 | -0.748398 | -2.146810 |
| H | -5.157735 | -0.111328 | 2.284676  |
| H | -5.898082 | 0.568253  | 1.007570  |
| H | -2.184553 | -1.509737 | -2.658373 |
| H | -2.397437 | 0.024300  | -3.059135 |
| H | -2.120099 | -0.578417 | 2.978900  |
| H | -2.389876 | 0.995146  | 2.877716  |
| H | 4.494609  | -2.902890 | -0.393569 |
| H | 4.253729  | 2.836102  | -1.227238 |
| H | 4.482517  | -2.682961 | 1.187657  |
| H | 4.241318  | 3.078156  | 0.350834  |
| H | 1.619832  | -2.344564 | 0.301882  |
| H | 1.430031  | 2.273104  | -0.340662 |
| H | 0.609596  | -1.077383 | 0.130334  |
| H | 0.529295  | 0.930675  | -0.141221 |
| H | 6.556704  | 0.067754  | -0.771845 |
| H | 6.529950  | 0.298081  | 0.807209  |
| H | -7.979669 | 0.566673  | -0.054858 |
| O | -7.125590 | 1.027819  | -0.129828 |
| H | -7.274272 | 1.978680  | -0.274616 |

### *Asociative Intermediate geometry*

DFT-optimized without symmetry constraints

E(B3LYP,small basis, gas phase)= -1214.57650094

#### (COMPLEX B1)

|   |           |           |           |
|---|-----------|-----------|-----------|
| U | 2.221657  | -0.141336 | -0.065031 |
| U | -2.391964 | -0.021864 | 0.018451  |
| F | -0.094898 | -0.381312 | 0.184706  |
| O | 2.086548  | -2.449169 | 0.783475  |
| O | 1.064657  | 1.968770  | -0.616971 |
| O | 2.024182  | -0.796858 | -1.706516 |
| O | 2.434569  | 0.432803  | 1.603855  |
| O | 4.525058  | -0.963762 | 0.104241  |

|   |           |           |           |
|---|-----------|-----------|-----------|
| O | 3.799187  | 1.568114  | -0.844492 |
| O | -2.649482 | -1.723345 | 0.478922  |
| O | -1.765472 | 1.568175  | -0.566890 |
| O | -3.931281 | 0.625152  | -1.875853 |
| O | -3.599377 | 1.852191  | 1.298765  |
| O | -1.734787 | -1.208922 | -2.036016 |
| O | -1.823573 | 0.033737  | 2.422095  |
| O | -4.879306 | -0.475690 | 0.516405  |
| H | 4.879874  | -1.815740 | -0.192023 |
| H | 5.238557  | -0.340793 | 0.396145  |
| H | 4.646077  | 1.693208  | -0.336157 |
| H | 3.883955  | 1.877891  | -1.760464 |
| H | 1.844184  | -3.233990 | 0.265286  |
| H | 2.308597  | -2.697426 | 1.696566  |
| H | 1.513495  | 2.827576  | -0.631263 |
| H | 0.095229  | 2.054151  | -0.711331 |
| H | -4.636469 | 0.086085  | -2.270409 |
| H | -4.253427 | 1.759719  | 2.010558  |
| H | -3.852468 | 1.477350  | -2.335273 |
| H | -3.466803 | 2.786094  | 1.067034  |
| H | -1.674809 | -2.177986 | -2.053116 |
| H | -1.693730 | -0.784447 | 2.928688  |
| H | -1.499197 | -0.834177 | -2.899930 |
| H | -1.655096 | 0.814942  | 2.972550  |
| H | -5.122972 | -1.365709 | 0.822887  |
| H | -5.666760 | 0.082082  | 0.408926  |
| H | 6.077387  | 1.569714  | 1.540381  |
| O | 6.030968  | 1.235676  | 0.626900  |
| H | 6.901517  | 1.332656  | 0.200663  |

***Dissociative Intermediate geometry***

DFT-optimized without symmetry constraints

E(B3LYP,small basis, gas phase)=-1214.58714602

**(COMPLEX D1)**

|   |           |           |           |
|---|-----------|-----------|-----------|
| U | 2.978442  | 0.065030  | 0.010547  |
| U | -2.774980 | 0.089411  | -0.023292 |
| F | -0.567081 | 0.796320  | -0.004276 |
| O | 4.163058  | 1.378187  | 0.068582  |
| O | 1.760405  | -1.243096 | -0.049617 |
| O | 1.519447  | 1.262940  | -1.444558 |
| O | 1.486206  | 1.168019  | 1.502300  |
| O | 4.514911  | -0.984404 | -1.485505 |
| O | 4.478792  | -1.080897 | 1.471586  |
| O | 6.735417  | -0.714792 | 0.030913  |
| O | -2.755149 | 0.233424  | -1.793525 |
| O | -2.706403 | 0.113023  | 1.752475  |
| O | -3.037478 | 2.541963  | 0.029811  |
| O | -5.176332 | 0.638349  | 0.056775  |
| O | -4.180129 | -1.945718 | -0.090580 |
| O | -1.203506 | -1.854721 | -0.154283 |
| H | 1.662773  | 1.867403  | -2.190967 |
| H | 1.612842  | 1.726638  | 2.286349  |
| H | 0.559498  | 1.157020  | -1.200615 |
| H | 0.530536  | 1.081920  | 1.225658  |
| H | 5.469385  | -0.887856 | -1.214253 |
| H | 5.439552  | -0.967581 | 1.230898  |
| H | 4.398825  | -1.583676 | -2.241110 |
| H | 4.343987  | -1.728090 | 2.183259  |
| H | 7.173375  | 0.155666  | 0.064233  |
| H | 7.413582  | -1.415107 | 0.016298  |
| H | -3.053077 | 3.111993  | -0.757091 |
| H | -3.025885 | 3.080721  | 0.837944  |

|   |           |           |           |
|---|-----------|-----------|-----------|
| H | -5.932232 | 0.002833  | 0.092252  |
| H | -5.489879 | 1.556515  | 0.062387  |
| H | -5.163770 | -1.911357 | 0.026352  |
| H | -3.914202 | -2.805914 | -0.453534 |
| H | -1.410081 | -2.794498 | -0.036404 |
| H | -0.239184 | -1.713180 | -0.129787 |
| H | -7.192312 | -1.687617 | 1.068397  |
| O | -6.774232 | -1.500293 | 0.210920  |
| H | -7.398573 | -1.717091 | -0.501661 |

***Intermediate following a dissociation of water from A-intermediate***

DFT-optimized without symmetry constraints

E(B3LYP,small basis, gas phase)=-1214.60026587

**(COMPLEX B3)**

|   |           |           |           |
|---|-----------|-----------|-----------|
| U | 2.262118  | 0.095739  | 0.016026  |
| U | -2.263458 | -0.041840 | 0.098301  |
| F | 0.004300  | 0.278536  | 0.597755  |
| O | 2.109451  | 2.253849  | 1.180379  |
| O | 1.165701  | -2.063670 | -0.399041 |
| O | 2.892902  | -0.563694 | 1.536125  |
| O | 1.623836  | 0.790523  | -1.514581 |
| O | 4.423486  | 1.201598  | -0.212777 |
| O | 3.817087  | -1.371810 | -1.142437 |
| O | -2.867470 | 1.524475  | 0.667621  |
| O | -1.623092 | -1.636088 | -0.431670 |
| O | -4.428906 | -0.965518 | 0.732622  |
| O | -3.814977 | 0.095650  | -1.774255 |
| O | -2.085049 | -0.642144 | 2.471586  |
| O | -1.169792 | 1.131023  | -1.765797 |
| O | -6.274566 | 0.352242  | -0.729564 |
| H | 5.249471  | 0.668062  | -0.079552 |
| H | 4.610981  | 2.087802  | -0.559633 |
| H | 3.707919  | -1.767875 | -2.021355 |
| H | 4.766037  | -1.391885 | -0.836501 |
| H | 1.506692  | 2.993077  | 1.001170  |
| H | 2.674852  | 2.454044  | 1.945646  |
| H | 1.619826  | -2.915953 | -0.303544 |
| H | 0.203527  | -2.180290 | -0.546768 |
| H | -5.261183 | -0.559001 | 0.372503  |
| H | -4.775449 | 0.299297  | -1.603265 |
| H | -4.606397 | -1.762863 | 1.255044  |
| H | -3.674153 | -0.257945 | -2.666876 |
| H | -2.488970 | -0.088648 | 3.162182  |
| H | -1.613558 | 1.792292  | -2.320494 |
| H | -1.571477 | -1.362412 | 2.872895  |
| H | -0.206703 | 1.093957  | -1.947655 |
| H | -6.588515 | 1.222254  | -0.424067 |
| H | -7.016470 | -0.141776 | -1.123056 |
| H | 6.499710  | -1.197391 | 0.727862  |
| O | 6.236122  | -0.815581 | -0.128672 |
| H | 7.010584  | -0.777137 | -0.718717 |

***Intermediate having 6-coordinated  $U_A$  and  $U_B$***

DFT-optimized without symmetry constraints

E(B3LYP,small basis, gas phase)=-1214.55620071

**(COMPLEX B5)**

|   |           |           |           |
|---|-----------|-----------|-----------|
| U | -2.298133 | -0.030400 | 0.092539  |
| U | 2.286537  | -0.018110 | 0.012969  |
| F | 0.000796  | 0.007363  | 0.500180  |
| O | -1.109768 | 1.592631  | -1.313946 |

Electronic Supplementary Information for Dalton Transactions  
This journal is © The Royal Society of Chemistry 2006

|   |           |           |           |
|---|-----------|-----------|-----------|
| O | -1.864597 | -1.653753 | 1.880240  |
| O | -1.775916 | -1.360635 | -1.010374 |
| O | -2.535344 | 1.078438  | 1.465608  |
| O | -3.709475 | 2.109754  | -0.626247 |
| O | -4.485569 | -0.911391 | 0.830626  |
| O | 1.718682  | 1.197921  | -1.191793 |
| O | 2.503889  | -1.256134 | 1.270040  |
| O | 3.752402  | -1.746297 | -1.126417 |
| O | 4.373969  | 0.559178  | 1.431847  |
| O | 1.033367  | -1.653319 | -1.344125 |
| O | 1.891054  | 1.788199  | 1.638325  |
| O | 4.280455  | 0.983213  | -1.315220 |
| H | -3.885908 | 2.707741  | 0.120497  |
| H | -4.245203 | 2.367160  | -1.394379 |
| H | -4.874778 | -0.738075 | 1.703920  |
| H | -5.045999 | -1.516130 | 0.318142  |
| H | -0.153575 | 1.572491  | -1.522444 |
| H | -1.552564 | 2.383910  | -1.655219 |
| H | -1.770040 | -1.404298 | 2.814143  |
| H | -1.719183 | -2.606581 | 1.763167  |
| H | 4.278678  | -1.619229 | -1.932619 |
| H | 4.957955  | 1.335080  | 1.416353  |
| H | 3.998124  | -2.573111 | -0.677740 |
| H | 4.675695  | -0.088307 | 2.091420  |
| H | 0.057163  | -1.710856 | -1.382460 |
| H | 1.278854  | 2.531599  | 1.523944  |
| H | 1.463131  | -2.348760 | -1.863079 |
| H | 2.299500  | 1.805917  | 2.518626  |
| H | 4.065658  | 1.652365  | -1.986669 |
| H | 5.241774  | 0.875042  | -1.229516 |
| H | -4.876938 | -0.015580 | -2.066032 |
| O | -3.999553 | -0.379369 | -1.864850 |
| H | -3.721423 | -1.001202 | -2.558176 |
